# Supplementary material for: Effectiveness of Virtual Reality on Balance and Risk of Falls in People with Multiple Sclerosis: A Systematic Review and Meta-Analysis
Source: MDPI journal article supplement (doi:10.3390/ijerph192114192), 2022-10-30

## **Supplementary Data**

### **Supplementary Material S1.** Search equations.

("Virtual Reality"[MeSH Terms] OR "Immersive virtual reality"[All fields] OR "Wii Balance Board,"[All fields] OR "Exergaming"[All fields] OR "Nintendo Wii™," [All fields] OR "Augmented Reality" [All fields] OR "Video Games"[All Fields]) AND ("Multiple Sclerosis"[MeSH Terms] AND ("Balance"[MeSH Terms] OR "Postural Balance"[MeSH Terms] OR "Gait"[MeSH Terms] OR "Walking Speed"[MeSH Terms] OR "Risk of falls"[All Fields] OR "Motor rehabilitation"[All Fields] OR "Neurorehabilitation"[All Fields] OR "Functional recovery"[All Fields] OR "Sway Area"[All Fields])

**Supplementary Material S2.** Synthesis funnel and Doi plot (LFK index) for BBS variable (RV vs conventional treatment) to assess the presence of publication bias.

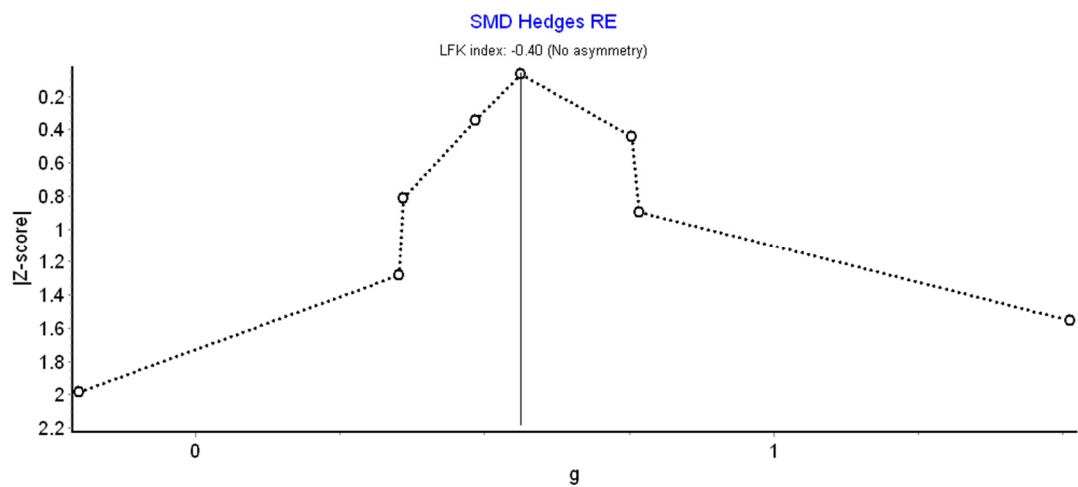

**Supplementary Material S3.** Synthesis funnel and Doi plot (LFK index) for BBS variable (RV vs no-treatment) to assess the presence of publication bias.

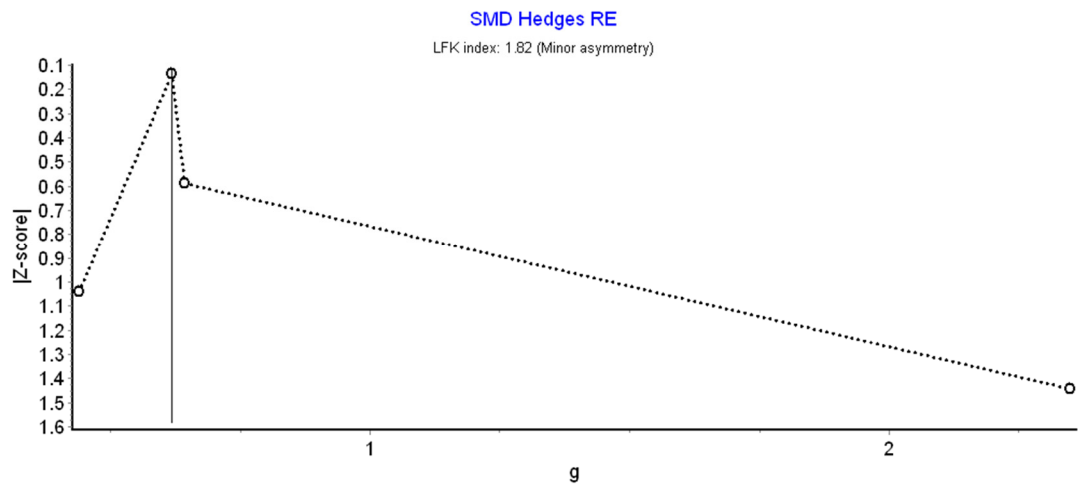

**Supplementary Material S4.** Synthesis funnel and Doi plot (LFK index) for TUG variable (RV vs conventional treatment) to assess the presence of publication bias.

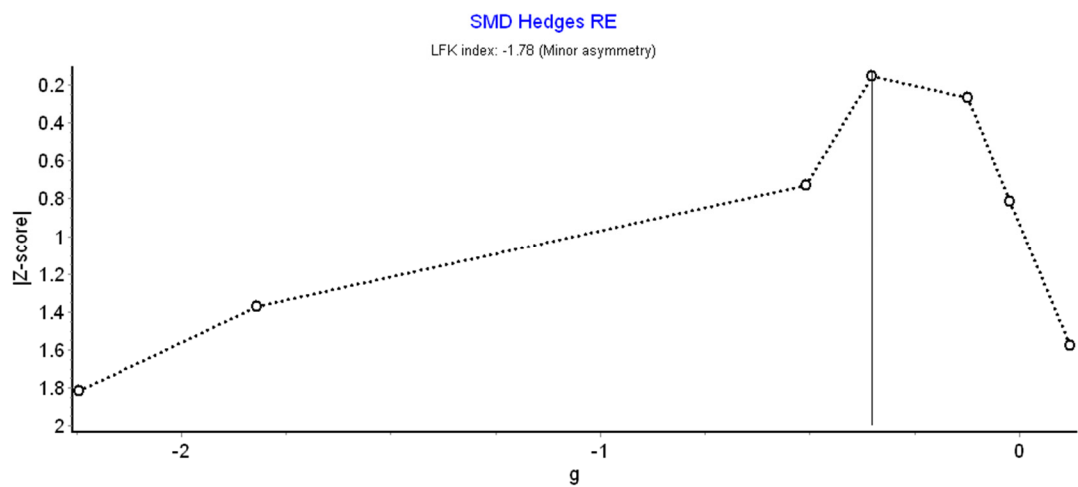

**Supplementary Material S5.** Synthesis funnel and Doi plot (LFK index) for TUG variable (RV vs no-treatment) to assess the presence of publication bias.

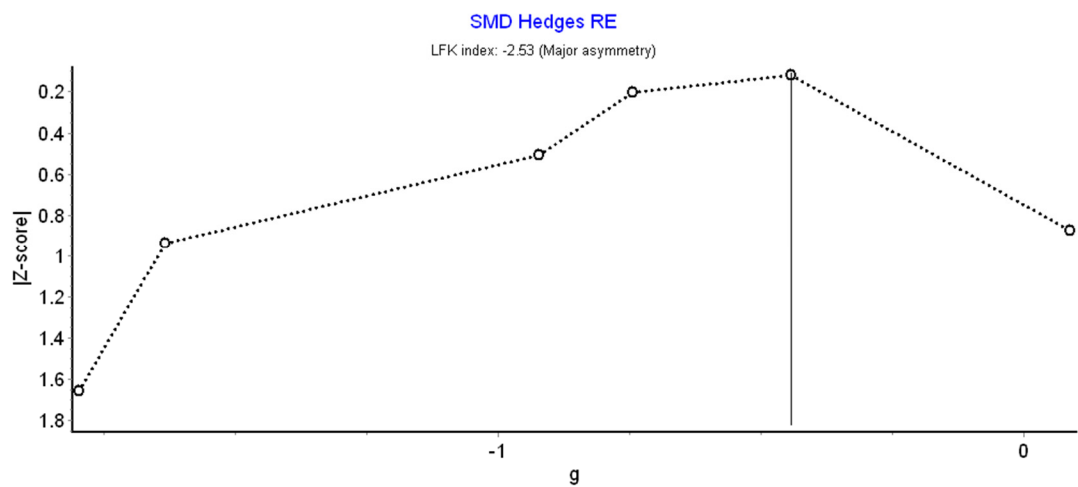

Supplement: s1 [file s1]
